# Supplementary material for: Limitations in Evaluating Machine Learning Models for Imbalanced Binary Outcome Classification in Spine Surgery: A Systematic Review
Source: MDPI journal article supplement (doi:10.3390/brainsci13121723), 2023-12-16
Supplement: s1 [file s1]

## Search Strategies

### OVID

Database(s): **Embase** 1988 to 2023 Week 08, **Ovid MEDLINE(R) and Epub Ahead of Print, In-Process, In-Data-Review & Other Non-Indexed Citations** 1996 to February 27, 2023, **EBM Reviews - Cochrane Central Register of Controlled Trials** January 2023, **EBM Reviews - Cochrane Database of Systematic Reviews** 2005 to February 22, 2023  
Search Strategy:

| # | Searches                                                                                                                                                                                                                                                                                                                                                                                                                                                                                                                                                                                                                                                                                                                                                                                                                                                                                                                                                                                                                                                                                                                                                                                                                                                                                                                                                                                                                                               |
|---|--------------------------------------------------------------------------------------------------------------------------------------------------------------------------------------------------------------------------------------------------------------------------------------------------------------------------------------------------------------------------------------------------------------------------------------------------------------------------------------------------------------------------------------------------------------------------------------------------------------------------------------------------------------------------------------------------------------------------------------------------------------------------------------------------------------------------------------------------------------------------------------------------------------------------------------------------------------------------------------------------------------------------------------------------------------------------------------------------------------------------------------------------------------------------------------------------------------------------------------------------------------------------------------------------------------------------------------------------------------------------------------------------------------------------------------------------------|
| 1 | exp artificial intelligence/                                                                                                                                                                                                                                                                                                                                                                                                                                                                                                                                                                                                                                                                                                                                                                                                                                                                                                                                                                                                                                                                                                                                                                                                                                                                                                                                                                                                                           |
| 2 | ("artificial intelligence*" or "deep learning" or "machine learn*" or "neural network*" or "network learning" or "1-nearest neighbor" or "a-i" or AdaBoost or ai or "association rule learning" or "automated pattern recognition" or "Bayesian learning" or "bayesian network*" or "computational intelligence*" or "computer reason*" or "computer vision*" or "connectionist model*" or "decision tree*" or "deep unified network*" or "expert system*" or "fuzzy logic*" or "fuzzy system*" or "genetic algorithm*" or heuristic* or "hidden markov model*" or "inductive logic program*" or "kernel method*" or "K-nearest neighbor" or "knowledge base*" or "knowledge engineering" or (knowledge and (acquisition* or aquis* or represent*) and (computer* or machine)) or knowledgebase* or (learn* adj2 algorithm*) or "learning classifier system*" or "learning machine*" or "logistic model tree*" or "machine intelligence*" or "metric learning" or "multilayer perceptron*" or "naive bayes" or "naive bayesian classifier*" or "natural language processing*" or perceptron* or radiomic* or "random forest*" or "random survival forest*" or "RBF network*" or "reinforcement learning" or "relevance vector machine*" or "representation learning" or "self-organizing map*" or "similarity learning" or "sparse dictionary learning" or "supervised learning" or "support vector machine*" or "unsupervised learning").ti,ab,hw,kf. |
| 3 | (algorithm* or automat* or computer*).ti.                                                                                                                                                                                                                                                                                                                                                                                                                                                                                                                                                                                                                                                                                                                                                                                                                                                                                                                                                                                                                                                                                                                                                                                                                                                                                                                                                                                                              |
| 4 | or/1-3                                                                                                                                                                                                                                                                                                                                                                                                                                                                                                                                                                                                                                                                                                                                                                                                                                                                                                                                                                                                                                                                                                                                                                                                                                                                                                                                                                                                                                                 |
| 5 | exp Spinal Fusion/                                                                                                                                                                                                                                                                                                                                                                                                                                                                                                                                                                                                                                                                                                                                                                                                                                                                                                                                                                                                                                                                                                                                                                                                                                                                                                                                                                                                                                     |
| 6 | exp Spine/su                                                                                                                                                                                                                                                                                                                                                                                                                                                                                                                                                                                                                                                                                                                                                                                                                                                                                                                                                                                                                                                                                                                                                                                                                                                                                                                                                                                                                                           |
| 7 | exp Spinal Diseases/su                                                                                                                                                                                                                                                                                                                                                                                                                                                                                                                                                                                                                                                                                                                                                                                                                                                                                                                                                                                                                                                                                                                                                                                                                                                                                                                                                                                                                                 |
| 8 | Lumbosacral Region/su                                                                                                                                                                                                                                                                                                                                                                                                                                                                                                                                                                                                                                                                                                                                                                                                                                                                                                                                                                                                                                                                                                                                                                                                                                                                                                                                                                                                                                  |
| 9 | ((spine or spinal or lumbar or lumbosacral or cervico* or cervical or thoracic or thoracolumbar or occipitocervical or "occipito-cervical" or occipitalcervical or "occipital-cervical" or atlantoaxial or "atlanto-axial" or occipitoatlantoaxial or "occipoto-atlantoaxial" or "craniovertebral junction" or subluxation or vertebr* or intervertebral or                                                                                                                                                                                                                                                                                                                                                                                                                                                                                                                                                                                                                                                                                                                                                                                                                                                                                                                                                                                                                                                                                            |

|    |                                                                                                                                                                                                       |
|----|-------------------------------------------------------------------------------------------------------------------------------------------------------------------------------------------------------|
|    | disc or discs or disk or disks or sacral or sacrum or "trans-sacr*") adj10 (fusion* or fused or fusing or fixation or decompression or surg* or operat* or arthrodesis or reconstruct*)).ti,ab,hw,kf. |
| 10 | (discectom* or diskectom* or laminectomy or spondylosyndesis).ti,ab,hw,kf.                                                                                                                            |
| 11 | exp Decompression, Surgical/                                                                                                                                                                          |
| 12 | spinal cord decompression/                                                                                                                                                                            |
| 13 | exp Diskectomy/                                                                                                                                                                                       |
| 14 | or/5-13                                                                                                                                                                                               |
| 15 | 4 and 14                                                                                                                                                                                              |
| 16 | limit 15 to english language [Limit not valid in CDSR; records were retained]                                                                                                                         |
| 17 | limit 16 to yr="2010 -Current"                                                                                                                                                                        |
| 18 | remove duplicates from 17                                                                                                                                                                             |

## SCOPUS

|   |                                                                                                                                                                                                                                                                                                                                                                                                                                                                                                                                                                                                                                                                                                                                                                                                                                                                                                                                                                                                                                                                                                                                                                                                                                                                                                                                                                                                                                                                  |
|---|------------------------------------------------------------------------------------------------------------------------------------------------------------------------------------------------------------------------------------------------------------------------------------------------------------------------------------------------------------------------------------------------------------------------------------------------------------------------------------------------------------------------------------------------------------------------------------------------------------------------------------------------------------------------------------------------------------------------------------------------------------------------------------------------------------------------------------------------------------------------------------------------------------------------------------------------------------------------------------------------------------------------------------------------------------------------------------------------------------------------------------------------------------------------------------------------------------------------------------------------------------------------------------------------------------------------------------------------------------------------------------------------------------------------------------------------------------------|
| 1 | TITLE-ABS-KEY ( "artificial intelligence*" OR "deep learning" OR "machine learn*" OR "neural network*" OR "network learning" OR "1-nearest neighbor" OR "a-i" OR adaboost OR ai OR "association rule learning" OR "automated pattern recognition" OR "bayesian learning" OR "bayesian network*" OR "computational intelligence*" OR "computer reason*" OR "computer vision*" OR "connectionist model*" OR "decision tree*" OR "deep unified network*" OR "expert system*" OR "fuzzy logic*" OR "fuzzy system*" OR "genetic algorithm*" OR heuristic* OR "hidden markov model*" OR "inductive logic program*" OR "kernel method*" OR "k-nearest neighbor" OR "knowledge base*" OR "knowledge engineering" OR ( knowledge AND ( acquisition* OR aquir* OR represent* ) AND ( computer* OR machine ) ) OR knowledgebase* OR ( learn* W/2 algorithm* ) OR "learning classifier system*" OR "learning machine*" OR "logistic model tree*" OR "machine intelligence*" OR "metric learning" OR "multilayer perceptron*" OR "naive bayes" OR "naive bayesian classifier*" OR "natural language processing*" OR perceptron* OR radiomic* OR "random forest*" OR "random survival forest*" OR "rbf network*" OR "reinforcement learning" OR "relevance vector machine*" OR "representation learning" OR "self-organizing map*" OR "similarity learning" OR "sparse dictionary learning" OR "supervised learning" OR "support vector machine*" OR "unsupervised learning" ) |
|---|------------------------------------------------------------------------------------------------------------------------------------------------------------------------------------------------------------------------------------------------------------------------------------------------------------------------------------------------------------------------------------------------------------------------------------------------------------------------------------------------------------------------------------------------------------------------------------------------------------------------------------------------------------------------------------------------------------------------------------------------------------------------------------------------------------------------------------------------------------------------------------------------------------------------------------------------------------------------------------------------------------------------------------------------------------------------------------------------------------------------------------------------------------------------------------------------------------------------------------------------------------------------------------------------------------------------------------------------------------------------------------------------------------------------------------------------------------------|

|   |                                                                                                                                                                                                                                                                                                                                                                                                                                                                                                                                                                                                                                                          |
|---|----------------------------------------------------------------------------------------------------------------------------------------------------------------------------------------------------------------------------------------------------------------------------------------------------------------------------------------------------------------------------------------------------------------------------------------------------------------------------------------------------------------------------------------------------------------------------------------------------------------------------------------------------------|
| 2 | TITLE-ABS-KEY ( ( spine OR spinal OR lumbar OR lumbosacral OR cervico* OR cervical OR thoracic OR thoracolumbar OR occipitocervical OR "occipito-cervical" OR occipitalcervical OR "occipital-cervical" OR atlantoaxial OR "atlanto-axial" OR occipitoatlantoaxial OR "occipoto-atlantoaxial" OR "craniovertebral junction" OR subluxation OR vertebr* OR intervertebral OR disc OR discs OR disk OR disks OR sacral OR sacrum OR "trans-sacr*" ) W/10 ( fusion* OR fused OR fusing OR fixation OR decompression OR surg* OR operat* OR arthrodesis OR reconstruct* ) ) OR TITLE-ABS-KEY ( discectom* OR diskectom* OR laminectomy OR spondylosyndesis ) |
| 3 | 1 AND 2                                                                                                                                                                                                                                                                                                                                                                                                                                                                                                                                                                                                                                                  |
| 4 | INDEX(embase) OR INDEX(medline) OR PMID(0* OR 1* OR 2* OR 3* OR 4* OR 5* OR 6* OR 7* OR 8* OR 9*)                                                                                                                                                                                                                                                                                                                                                                                                                                                                                                                                                        |
| 5 | 3 NOT 4                                                                                                                                                                                                                                                                                                                                                                                                                                                                                                                                                                                                                                                  |
| 6 | DOCTYPE(ed) OR DOCTYPE(bk) OR DOCTYPE(er) OR DOCTYPE(no) OR DOCTYPE(sh) OR DOCTYPE(ch)                                                                                                                                                                                                                                                                                                                                                                                                                                                                                                                                                                   |
| 7 | 5 NOT 6                                                                                                                                                                                                                                                                                                                                                                                                                                                                                                                                                                                                                                                  |
| 8 | 7 AND ( PUBYEAR > 2009 ) AND LIMIT-TO ( LANGUAGE , "English" ) )                                                                                                                                                                                                                                                                                                                                                                                                                                                                                                                                                                                         |

## Web of Science

|   |                                                                                                                                                                                                                                                                                                                                                                                                                                                                                                                                                                                                                                                                                                                                           |
|---|-------------------------------------------------------------------------------------------------------------------------------------------------------------------------------------------------------------------------------------------------------------------------------------------------------------------------------------------------------------------------------------------------------------------------------------------------------------------------------------------------------------------------------------------------------------------------------------------------------------------------------------------------------------------------------------------------------------------------------------------|
| 1 | TS=( "artificial intelligence*" OR "deep learning" OR "machine learn*" OR "neural network*" OR "network learning" OR "1-nearest neighbor" OR "a-i" OR adaboost OR ai OR "association rule learning" OR "automated pattern recognition" OR "bayesian learning" OR "bayesian network*" OR "computational intelligence*" OR "computer reason*" OR "computer vision*" OR "connectionist model*" OR "decision tree*" OR "deep unified network*" OR "expert system*" OR "fuzzy logic*" OR "fuzzy system*" OR "genetic algorithm*" OR heuristic* OR "hidden markov model*" OR "inductive logic program*" OR "kernel method*" OR "k-nearest neighbor" OR "knowledge base*" OR "knowledge engineering" OR ( knowledge AND ( acquisition* OR aquis* |
|---|-------------------------------------------------------------------------------------------------------------------------------------------------------------------------------------------------------------------------------------------------------------------------------------------------------------------------------------------------------------------------------------------------------------------------------------------------------------------------------------------------------------------------------------------------------------------------------------------------------------------------------------------------------------------------------------------------------------------------------------------|

|   |                                                                                                                                                                                                                                                                                                                                                                                                                                                                                                                                                                                                                                                                                                                |
|---|----------------------------------------------------------------------------------------------------------------------------------------------------------------------------------------------------------------------------------------------------------------------------------------------------------------------------------------------------------------------------------------------------------------------------------------------------------------------------------------------------------------------------------------------------------------------------------------------------------------------------------------------------------------------------------------------------------------|
|   | OR represent* ) AND ( computer* OR machine ) ) OR knowledgebase* OR ( learn* NEAR/2 algorithm* ) OR "learning classifier system*" OR "learning machine*" OR "logistic model tree*" OR "machine intelligence*" OR "metric learning" OR "multilayer perceptron*" OR "naive bayes" OR "naive bayesian classifier*" OR "natural language processing*" OR perceptron* OR radiomic* OR "random forest*" OR "random survival forest*" OR "rbf network*" OR "reinforcement learning" OR "relevance vector machine*" OR "representation learning" OR "self-organizing map*" OR "similarity learning" OR "sparse dictionary learning" OR "supervised learning" OR "support vector machine*" OR "unsupervised learning" ) |
| 2 | TI=( ( spine OR spinal OR lumbar OR lumbosacral OR cervico* OR cervical OR thoracic OR thoracolumbar OR occipitocervical OR "occipito-cervical" OR occipitalcervical OR "occipital-cervical" OR atlantoaxial OR "atlanto-axial" OR occipitoatlantoaxial OR "occipoto-atlantoaxial" OR "craniovertebral junction" OR subluxation OR vertebr* OR intervertebral OR disc OR discs OR disk OR disks OR sacral OR sacrum OR "trans-sacr*" ) NEAR/10 ( fusion* OR fused OR fusing OR fixation OR decompression OR surg* OR operat* OR arthrodesis OR reconstruct* ) ) OR TS=( discectom* OR diskectom* OR laminectomy OR spondylosyndesi                                                                             |
| 3 | 1 AND 2                                                                                                                                                                                                                                                                                                                                                                                                                                                                                                                                                                                                                                                                                                        |
| 4 | PMID=(0* or 1* or 2* or 3* or 4* or 5* or 6* or 7* or 8* or 9*)                                                                                                                                                                                                                                                                                                                                                                                                                                                                                                                                                                                                                                                |
| 5 | 3 NOT 4                                                                                                                                                                                                                                                                                                                                                                                                                                                                                                                                                                                                                                                                                                        |
| 6 | 5 and PY=2010-2023                                                                                                                                                                                                                                                                                                                                                                                                                                                                                                                                                                                                                                                                                             |
| 7 | Refined By:Languages: English                                                                                                                                                                                                                                                                                                                                                                                                                                                                                                                                                                                                                                                                                  |
